# Supplementary material for: Association of Grain Iron and Zinc Content With Other Nutrients in Pearl Millet Germplasm, Breeding Lines, and Hybrids
Source: PubMed Central journal article supplement (PMC8847779; doi:10.3389/fnut.2021.746625), 2022-02-02
Supplement: Table_1.pdf [file Table_1.pdf]

**Supplementary table 1.** Mean and variability for grain macronutrient density in pearl millet breeding trials at ICRISAT, Hyderabad, India.

| Trial name                     | P (mg 100 g <sup>-1</sup> ) |           | K (mg 100 g <sup>-1</sup> ) |           | Ca (mg 100 g <sup>-1</sup> ) |            | Mg (mg 100 g <sup>-1</sup> ) |           |
|--------------------------------|-----------------------------|-----------|-----------------------------|-----------|------------------------------|------------|------------------------------|-----------|
|                                | Mean                        | Range     | Mean                        | Range     | Mean                         | Range      | Mean                         | Range     |
| <u>Hybrid trials</u>           |                             |           |                             |           |                              |            |                              |           |
| Commercial hybrid trial        | 374                         | 325 - 435 | 500                         | 405 - 600 | 10                           | 6.5 - 16.0 | 135                          | 113 - 168 |
| Hybrid trial-1                 | 357                         | 330 - 395 | 492                         | 425 - 575 | 10                           | 6.8 - 15.1 | 120                          | 108 - 132 |
| Hybrid trial-2                 | 370                         | 325 - 415 | 492                         | 450 - 535 | 11                           | 8.7 - 16.3 | 124                          | 109 - 149 |
| Hybrid trial-3                 | 371                         | 345 - 400 | 473                         | 430 - 555 | 10                           | 7.0 - 17.8 | 125                          | 113 - 142 |
| Hybrid trial-4                 | 379                         | 335 - 410 | 484                         | 415 - 550 | 10                           | 4.2 - 16.5 | 133                          | 112 - 152 |
| Released cultivar trial        | 330                         | 275 - 380 | 415                         | 350 - 530 | 12                           | 7.8 - 17.8 | 124                          | 102 - 157 |
| <u>Breeding/Parental lines</u> |                             |           |                             |           |                              |            |                              |           |
| Hybrid parental trial-1        | 361                         | 313 - 450 | 500                         | 397 - 663 | 14                           | 7.5 - 28.0 | 118                          | 94 - 151  |
| Hybrid parental trial-2        | 384                         | 330 - 467 | 518                         | 363 - 633 | 15                           | 7.9 - 26.0 | 130                          | 98 - 165  |
| Testcross parental trial-1     | 366                         | 310 - 445 | 503                         | 405 - 660 | 14                           | 5.1 - 29.0 | 126                          | 96 - 172  |
| Testcross parental trial-2     | 363                         | 310 - 445 | 487                         | 355 - 670 | 15                           | 8.3 - 40.0 | 130                          | 95 - 171  |
| Testcross parental trial-3     | 366                         | 295 - 420 | 485                         | 355 - 695 | 13                           | 7.7 - 24.0 | 129                          | 104 - 163 |
| Testcross parental trial-4     | 377                         | 315 - 470 | 513                         | 390 - 725 | 14                           | 6.5 - 28.5 | 136                          | 107 - 177 |
| <i>Iniadi</i> accessions       | 387                         | 330 - 475 | 430                         | 340 - 550 | 13                           | 7.5 - 35.0 | 144                          | 117 - 189 |
| Designated B-lines             | 378                         | 310 - 495 | 552                         | 410 - 675 | 12                           | 6.8 - 20.5 | 140                          | 109 - 174 |
| Across trials                  | 369                         | 275 - 495 | 489                         | 340 - 725 | 12                           | 4.2 - 40.0 | 130                          | 94 - 189  |

**Supplementary table 2.** Mean and variability for grain micronutrient density in pearl millet breeding trials at ICRISAT, Hyderabad, India.

| Trial name                 | Fe (mg kg <sup>-1</sup> ) |          | Zn (mg kg <sup>-1</sup> ) |         | Mn (mg kg <sup>-1</sup> ) |         | Na (mg kg <sup>-1</sup> ) |         |
|----------------------------|---------------------------|----------|---------------------------|---------|---------------------------|---------|---------------------------|---------|
|                            | Mean                      | Range    | Mean                      | Range   | Mean                      | Range   | Mean                      | Range   |
| Hybrid trials              |                           |          |                           |         |                           |         |                           |         |
| Commercial hybrid trial    | 42                        | 31 - 53  | 35                        | 26 - 45 | 12                        | 10 - 16 | 16                        | 7 - 29  |
| Hybrid trial-1             | 54                        | 39 - 68  | 37                        | 31 - 49 | 12                        | 9 - 15  | 13                        | 6 - 20  |
| Hybrid trial-2             | 54                        | 43 - 68  | 38                        | 32 - 49 | 12                        | 10 - 17 | 14                        | 10 - 24 |
| Hybrid trial-3             | 48                        | 36 - 61  | 38                        | 29 - 47 | 12                        | 10 - 16 | 11                        | 7 - 19  |
| Hybrid trial-4             | 47                        | 38 - 60  | 37                        | 30 - 44 | 12                        | 9 - 15  | 11                        | 7 - 19  |
| Released cultivar trial    | 49                        | 34 - 82  | 42                        | 29 - 57 | 14                        | 11 - 19 | 15                        | 7- 29   |
| Breeding/Parental lines    |                           |          |                           |         |                           |         |                           |         |
| Hybrid parental trial-1    | 62                        | 35 - 93  | 42                        | 26 - 62 | 11                        | 8 - 20  | 12                        | 3 - 30  |
| Hybrid parental trial-2    | 53                        | 30 - 83  | 39                        | 27 - 64 | 11                        | 7 - 18  | 13                        | 3 - 31  |
| Testcross parental trial-1 | 55                        | 32 - 98  | 41                        | 24 - 60 | 12                        | 8 - 20  | 11                        | 4 - 24  |
| Testcross parental trial-2 | 56                        | 27 - 145 | 42                        | 26 - 95 | 13                        | 8 - 23  | 11                        | 3 - 22  |
| Testcross parental trial-3 | 51                        | 30 - 100 | 40                        | 25 - 64 | 12                        | 8 - 18  | 11                        | 3 - 26  |
| Testcross parental trial-4 | 56                        | 29 - 94  | 42                        | 22 - 70 | 13                        | 8 - 19  | 12                        | 5 - 23  |
| <i>Iniadi</i> accessions   | 72                        | 44 - 119 | 62                        | 40 - 96 | 16                        | 10 - 21 | 18                        | 5- 41   |
| Designated B-lines         | 50                        | 24 - 80  | 37                        | 23 - 49 | 13                        | 8 - 17  | 14                        | 8- 25   |
| Across trials              | 53                        | 24-145   | 41                        | 22-96   | 13                        | 7-23    | 13                        | 3-41    |
